# Supplementary material for: The physical nature of the interaction in DMSO extraction separation of C8H10 isomer/n-decane systems
Source: Royal Society of Chemistry journal article supplement (doi:10.1039/d1cp03128g), 2021-01-01
Supplement: d1cp03128g1.pdf [file d1cp03128g1.pdf]

## Appendix A. Supplementary material

Table S1. Experimental LLE data for DMSO (1)-aromatics (2)-decane (3) ternary system (mass fraction) at 30 °C under atmospheric pressure.<sup>a</sup>

| DMSO phase                                   |          |          | decane phase |          |          | $K_{ar}$ | $K_{al}$ |
|----------------------------------------------|----------|----------|--------------|----------|----------|----------|----------|
| $w_{11}$                                     | $w_{12}$ | $w_{13}$ | $w_{21}$     | $w_{22}$ | $w_{23}$ |          |          |
| DMSO (1) + <i>o</i> -xylene (2) + decane (3) |          |          |              |          |          |          |          |
| 0.9979                                       | 0.0000   | 0.0021   | 0.0053       | 0.0000   | 0.9947   | —        | —        |
| 0.9650                                       | 0.0261   | 0.0089   | 0.0074       | 0.0737   | 0.9189   | 0.3537   | 0.0097   |
| 0.9060                                       | 0.0826   | 0.0114   | 0.0120       | 0.2103   | 0.7777   | 0.3927   | 0.0147   |
| 0.8464                                       | 0.1390   | 0.0146   | 0.0167       | 0.3349   | 0.6484   | 0.4150   | 0.0226   |
| 0.7818                                       | 0.2004   | 0.0179   | 0.0314       | 0.4466   | 0.5220   | 0.4486   | 0.0342   |
| 0.7090                                       | 0.2670   | 0.0240   | 0.0586       | 0.5415   | 0.3999   | 0.4932   | 0.0599   |
| 0.6458                                       | 0.3153   | 0.0389   | 0.0786       | 0.5807   | 0.3407   | 0.5430   | 0.1140   |
| 0.6122                                       | 0.3427   | 0.0451   | 0.0876       | 0.5929   | 0.3196   | 0.5780   | 0.1412   |
| DMSO (1) + <i>m</i> -xylene (2) + decane (3) |          |          |              |          |          |          |          |
| 0.9979                                       | 0.0000   | 0.0021   | 0.0053       | 0.0000   | 0.9947   | —        | —        |
| 0.9721                                       | 0.0211   | 0.0069   | 0.0080       | 0.0762   | 0.9157   | 0.2761   | 0.0075   |
| 0.9264                                       | 0.0660   | 0.0077   | 0.0134       | 0.2197   | 0.7669   | 0.3002   | 0.0100   |
| 0.8696                                       | 0.1184   | 0.0119   | 0.0222       | 0.3431   | 0.6347   | 0.3452   | 0.0188   |
| 0.8114                                       | 0.1713   | 0.0172   | 0.0346       | 0.4559   | 0.5095   | 0.3758   | 0.0338   |
| 0.7451                                       | 0.2315   | 0.0234   | 0.0556       | 0.5511   | 0.3933   | 0.4200   | 0.0596   |
| 0.6901                                       | 0.2759   | 0.0341   | 0.0728       | 0.5885   | 0.3387   | 0.4687   | 0.1006   |
| 0.6502                                       | 0.3037   | 0.0461   | 0.0790       | 0.6045   | 0.3164   | 0.5024   | 0.1457   |
| DMSO (1) + <i>p</i> -xylene (2) + decane (3) |          |          |              |          |          |          |          |
| 0.9979                                       | 0.0000   | 0.0021   | 0.0053       | 0.0000   | 0.9947   | —        | —        |
| 0.9729                                       | 0.0204   | 0.0067   | 0.0057       | 0.0788   | 0.9155   | 0.2590   | 0.0074   |
| 0.9263                                       | 0.0649   | 0.0087   | 0.0096       | 0.2213   | 0.7691   | 0.2934   | 0.0114   |
| 0.8729                                       | 0.1145   | 0.0126   | 0.0141       | 0.3468   | 0.6391   | 0.3302   | 0.0196   |
| 0.8212                                       | 0.1650   | 0.0138   | 0.0280       | 0.4602   | 0.5118   | 0.3585   | 0.0270   |
| 0.7637                                       | 0.2200   | 0.0163   | 0.0485       | 0.5558   | 0.3957   | 0.3958   | 0.0413   |
| 0.7262                                       | 0.2537   | 0.0200   | 0.0664       | 0.5970   | 0.3366   | 0.4250   | 0.0595   |
| 0.7012                                       | 0.2721   | 0.0267   | 0.0730       | 0.6104   | 0.3166   | 0.4458   | 0.0844   |
| DMSO (1) + ethylbenzene (2) + decane (3)     |          |          |              |          |          |          |          |
| 0.9979                                       | 0.0000   | 0.0021   | 0.0053       | 0.0000   | 0.9947   | —        | —        |
| 0.9695                                       | 0.0248   | 0.0057   | 0.0076       | 0.0747   | 0.9177   | 0.3327   | 0.0062   |
| 0.9176                                       | 0.0750   | 0.0074   | 0.0135       | 0.2133   | 0.7733   | 0.3515   | 0.0096   |
| 0.8544                                       | 0.1349   | 0.0107   | 0.0169       | 0.3356   | 0.6475   | 0.4020   | 0.0165   |
| 0.7917                                       | 0.1942   | 0.0141   | 0.0318       | 0.4497   | 0.5185   | 0.4318   | 0.0272   |
| 0.7193                                       | 0.2605   | 0.0202   | 0.0577       | 0.5428   | 0.3995   | 0.4799   | 0.0506   |
| 0.6732                                       | 0.3016   | 0.0251   | 0.0785       | 0.5787   | 0.3428   | 0.5212   | 0.0734   |
| 0.6544                                       | 0.3184   | 0.0273   | 0.0898       | 0.5926   | 0.3176   | 0.5373   | 0.0858   |

<sup>a</sup> Model oils were prepared using a Sartorius BSA124S analytical balance ( $d=0.1$  mg). The standard uncertainties:  $u(T) = 0.05$  °C,  $u(p) = 0.1$  MPa.

Table S2. The fitting parameters  $a$ ,  $b$ , and corresponding linear regression coefficients  $R^2$  of Othmer-Tobias equation for DMSO-aromatics-decane experimental data.

| LLE                                          | $a$    | $b$     | $R^2$  |
|----------------------------------------------|--------|---------|--------|
| DMSO (1) + <i>o</i> -xylene (2) + decane (3) | 0.9324 | -1.174  | 0.9984 |
| DMSO (1) + <i>m</i> -xylene (2) + decane (3) | 0.9067 | -1.4062 | 0.9994 |
| DMSO (1) + <i>p</i> -xylene (2) + decane (3) | 0.8778 | -1.508  | 0.9993 |
| DMSO (1) + ethylbenzene (2) + decane (3)     | 0.9185 | -1.2897 | 0.9994 |

Table S3. Interaction energies (kJ/mol) of stationary interaction dimers calculated at M06-2X/6-311++g(d, p) level.

|              | <i>o</i> -xylene | <i>m</i> -xylene | <i>p</i> -xylene | ethylbenzene |
|--------------|------------------|------------------|------------------|--------------|
| DMSO         | -37.7982         | -32.3148         | -30.3056         | -32.7752     |
| decane       | -29.6358         | -31.6450         | -30.1800         | -30.0544     |
| decane(DMSO) | -21.8316         | -23.2202         | -20.5230         | -21.0035     |

Table S4. AIM topological analysis properties at (3,-1) BCP of aromatics-DMSO dimers.

|                       | Bond paths                                             | $\rho(r)/\text{a.u.}$ | $\nabla^2\rho(r)/\text{a.u.}$ | Distance/Å | $H(r)/\text{a.u.}$ | $E_H(\text{kJ/mol})$ |
|-----------------------|--------------------------------------------------------|-----------------------|-------------------------------|------------|--------------------|----------------------|
| <i>o</i> -xylene/DMSO | C <sub>11</sub> -H <sub>12</sub> ⋯O <sub>19</sub> (58) | 0.0131                | 0.0413                        | 2.350      | >0                 | -2.18                |
|                       | C <sub>15</sub> -H <sub>16</sub> ⋯O <sub>19</sub> (62) | 0.0129                | 0.0436                        | 2.306      | >0                 | -2.14                |
|                       | C <sub>4</sub> ⋯H <sub>23</sub> -C <sub>20</sub> (41)  | 0.0066                | 0.0194                        | 2.810      |                    |                      |
|                       | C <sub>2</sub> ⋯H <sub>25</sub> -C <sub>24</sub> (45)  | 0.0073                | 0.0250                        | 2.800      | >0                 | -0.89                |
| <i>m</i> -xylene/DMSO | C <sub>11</sub> -H <sub>14</sub> ⋯O <sub>19</sub> (60) | 0.0122                | 0.0407                        | 2.348      | >0                 | -1.98                |
|                       | C <sub>2</sub> ⋯S <sub>28</sub> (49)                   | 0.0081                | 0.0264                        | 3.283      |                    |                      |
|                       | C <sub>4</sub> ⋯H <sub>21</sub> -C <sub>20</sub> (50)  | 0.0077                | 0.0257                        | 2.721      | >0                 | -0.98                |
| <i>p</i> -xylene/DMSO | C <sub>11</sub> -H <sub>13</sub> ⋯O <sub>19</sub> (58) | 0.0131                | 0.0417                        | 2.348      | >0                 | -2.18                |
|                       | C <sub>5</sub> ⋯O <sub>19</sub> (52)                   | 0.0071                | 0.0232                        | 3.225      |                    |                      |
|                       | C <sub>5</sub> ⋯H <sub>25</sub> -C <sub>24</sub> (41)  | 0.0074                | 0.0255                        | 2.782      | >0                 | -0.91                |
|                       | C <sub>6</sub> ⋯H <sub>23</sub> -C <sub>20</sub> (50)  | 0.0064                | 0.0193                        | 2.833      |                    |                      |
| ethylbenzene/DMSO     | C <sub>15</sub> -H <sub>17</sub> ⋯O <sub>19</sub> (60) | 0.0097                | 0.0367                        | 2.443      | >0                 | -1.42                |
|                       | C <sub>12</sub> -H <sub>13</sub> ⋯O <sub>19</sub> (59) | 0.0097                | 0.0354                        | 2.561      | >0                 | -1.42                |
|                       | C <sub>3</sub> ⋯O <sub>19</sub> (54)                   | 0.0071                | 0.0223                        | 3.262      |                    |                      |
|                       | C <sub>2</sub> ⋯H <sub>23</sub> -C <sub>20</sub> (37)  | 0.0058                | 0.0170                        | 2.876      |                    |                      |
|                       | C <sub>3</sub> ⋯H <sub>25</sub> -C <sub>24</sub> (47)  | 0.0075                | 0.0256                        | 2.771      | >0                 | -0.93                |

Table S5. AIM topological analysis properties at (3,-1) BCP of aromatics-decane dimers.

|                                                                         | Bond paths                                                               | $\rho(r)/\text{a.u.}$ | $\nabla^2\rho(r)/\text{a.u.}$ | Distance/Å |
|-------------------------------------------------------------------------|--------------------------------------------------------------------------|-----------------------|-------------------------------|------------|
| <i>o</i> -xylene/decane                                                 | C <sub>6</sub> ⋯H <sub>28</sub> -C <sub>26</sub> (93)                    | 0.0057                | 0.0168                        | 2.920      |
|                                                                         | C <sub>1</sub> ⋯H <sub>31</sub> -C <sub>29</sub> (82)                    | 0.0065                | 0.0194                        | 2.907      |
|                                                                         | C <sub>2</sub> ⋯H <sub>33</sub> -C <sub>32</sub> (95)                    | 0.0062                | 0.0202                        | 2.966      |
|                                                                         | C <sub>3</sub> ⋯H <sub>37</sub> -C <sub>35</sub> (120)                   | 0.0053                | 0.0161                        | 3.052      |
|                                                                         | C <sub>15</sub> -H <sub>16</sub> ⋯H <sub>37</sub> -C <sub>35</sub> (77)  | 0.0065                | 0.0223                        | 2.276      |
|                                                                         | C <sub>11</sub> -H <sub>12</sub> ⋯H <sub>37</sub> -C <sub>35</sub> (86)  | 0.0066                | 0.0232                        | 2.309      |
|                                                                         | C <sub>11</sub> -H <sub>12</sub> ⋯H <sub>43</sub> -C <sub>41</sub> (89)  | 0.0062                | 0.0218                        | 2.311      |
|                                                                         | C <sub>3</sub> ⋯H <sub>39</sub> -C <sub>38</sub> (102)                   | 0.0060                | 0.0185                        | 2.904      |
| C <sub>11</sub> ⋯H <sub>39</sub> -C <sub>38</sub> (99)                  | 0.0058                                                                   | 0.0212                | 2.877                         |            |
| <i>m</i> -xylene/decane                                                 | C <sub>15</sub> -H <sub>18</sub> ⋯H <sub>48</sub> -C <sub>47</sub> (92)  | 0.0050                | 0.0176                        | 2.531      |
|                                                                         | C <sub>15</sub> -H <sub>18</sub> ⋯H <sub>46</sub> -C <sub>44</sub> (79)  | 0.0055                | 0.0199                        | 2.459      |
|                                                                         | C <sub>15</sub> -H <sub>16</sub> ⋯H <sub>42</sub> -C <sub>41</sub> (93)  | 0.0053                | 0.0187                        | 2.477      |
|                                                                         | C <sub>1</sub> ⋯H <sub>42</sub> -C <sub>41</sub> (88)                    | 0.0059                | 0.0179                        | 2.950      |
|                                                                         | C <sub>6</sub> ⋯H <sub>46</sub> -C <sub>44</sub> (73)                    | 0.0055                | 0.0163                        | 2.943      |
|                                                                         | C <sub>6</sub> ⋯H <sub>40</sub> -C <sub>38</sub> (69)                    | 0.0060                | 0.0195                        | 2.912      |
|                                                                         | C <sub>2</sub> ⋯H <sub>40</sub> -C <sub>38</sub> (78)                    | 0.0061                | 0.0196                        | 2.974      |
|                                                                         | C <sub>3</sub> ⋯H <sub>36</sub> -C <sub>35</sub> (86)                    | 0.0060                | 0.0178                        | 2.963      |
| C <sub>3</sub> ⋯H <sub>34</sub> -C <sub>32</sub> (70)                   | 0.0059                                                                   | 0.0176                | 2.943                         |            |
| C <sub>11</sub> -H <sub>13</sub> ⋯H <sub>30</sub> -C <sub>29</sub> (84) | 0.0055                                                                   | 0.0193                | 2.526                         |            |
| <i>p</i> -xylene/decane                                                 | C <sub>11</sub> ⋯H <sub>48</sub> -C <sub>47</sub> (84)                   | 0.0058                | 0.0215                        | 2.870      |
|                                                                         | C <sub>11</sub> -H <sub>13</sub> ⋯H <sub>46</sub> -C <sub>44</sub> (93)  | 0.0050                | 0.0184                        | 2.455      |
|                                                                         | C <sub>5</sub> ⋯H <sub>46</sub> -C <sub>44</sub> (83)                    | 0.0059                | 0.0175                        | 2.912      |
|                                                                         | C <sub>1</sub> ⋯H <sub>42</sub> -C <sub>41</sub> (79)                    | 0.0064                | 0.0203                        | 2.864      |
|                                                                         | C <sub>4</sub> ⋯H <sub>40</sub> -C <sub>38</sub> (81)                    | 0.0070                | 0.0215                        | 2.805      |
|                                                                         | C <sub>3</sub> ⋯H <sub>36</sub> -C <sub>35</sub> (76)                    | 0.0066                | 0.0218                        | 2.800      |
|                                                                         | C <sub>4</sub> -H <sub>9</sub> ⋯H <sub>34</sub> -C <sub>32</sub> (71)    | 0.0032                | 0.0101                        | 2.695      |
|                                                                         | C <sub>15</sub> -H <sub>18</sub> ⋯H <sub>34</sub> -C <sub>32</sub> (72)  | 0.0044                | 0.0153                        | 2.547      |
| C <sub>15</sub> -H <sub>18</sub> ⋯H <sub>30</sub> -C <sub>29</sub> (73) | 0.0046                                                                   | 0.0158                | 2.522                         |            |
| ethylbenzene/decane                                                     | C <sub>15</sub> -H <sub>18</sub> ⋯H <sub>25</sub> -C <sub>23</sub> (99)  | 0.0060                | 0.0211                        | 2.325      |
|                                                                         | C <sub>15</sub> -H <sub>18</sub> ⋯H <sub>27</sub> -C <sub>26</sub> (103) | 0.0056                | 0.0204                        | 2.583      |
|                                                                         | C <sub>15</sub> -H <sub>18</sub> ⋯H <sub>30</sub> -C <sub>29</sub> (98)  | 0.0065                | 0.0228                        | 2.312      |
|                                                                         | C <sub>12</sub> -H <sub>14</sub> ⋯H <sub>27</sub> -C <sub>26</sub> (102) | 0.0071                | 0.0250                        | 2.257      |
|                                                                         | C <sub>12</sub> -H <sub>14</sub> ⋯H <sub>34</sub> -C <sub>32</sub> (95)  | 0.0072                | 0.0254                        | 2.237      |
|                                                                         | C <sub>3</sub> ⋯H <sub>30</sub> -C <sub>29</sub> (101)                   | 0.0055                | 0.0158                        | 2.962      |
|                                                                         | C <sub>4</sub> ⋯H <sub>34</sub> -C <sub>32</sub> (97)                    | 0.0054                | 0.0162                        | 3.034      |
|                                                                         | C <sub>6</sub> ⋯H <sub>36</sub> -C <sub>35</sub> (89)                    | 0.0063                | 0.0207                        | 2.908      |
|                                                                         | C <sub>6</sub> ⋯H <sub>40</sub> -C <sub>38</sub> (88)                    | 0.0061                | 0.0182                        | 2.942      |
| C <sub>6</sub> ⋯H <sub>42</sub> -C <sub>41</sub> (86)                   | 0.0056                                                                   | 0.0166                | 2.953                         |            |

Table S6. Contribution percentage of the energy decomposition derived dispersion, electrostatic, and induction attractive effects within aromatics-DMSO dimers at SAPT2+(3) $\delta$ MP2/aug-cc-pVTZ level.

|                       | Attraction         |                     |                    |
|-----------------------|--------------------|---------------------|--------------------|
|                       | $E_{\text{dis}}\%$ | $E_{\text{elst}}\%$ | $E_{\text{ind}}\%$ |
| <i>o</i> -xylene/DMSO | 49.57              | 37.83               | 12.60              |
| <i>m</i> -xylene/DMSO | 50.52              | 37.21               | 12.27              |
| <i>p</i> -xylene/DMSO | 53.14              | 35.57               | 11.29              |
| ethylbenzene/DMSO     | 53.30              | 35.49               | 11.21              |

Table S7. Contribution percentage of the energy decomposition derived dispersion, electrostatic, and induction attractive effects within aromatics-decane dimers at SAPT2+(3) $\delta$ MP2/aug-cc-pVTZ level.

|                         | Attraction         |                     |                    |
|-------------------------|--------------------|---------------------|--------------------|
|                         | $E_{\text{dis}}\%$ | $E_{\text{elst}}\%$ | $E_{\text{ind}}\%$ |
| <i>o</i> -xylene/decane | 70.89              | 23.42               | 5.69               |
| <i>m</i> -xylene/decane | 70.93              | 23.91               | 5.16               |
| <i>p</i> -xylene/decane | 70.56              | 24.29               | 5.15               |
| ethylbenzene/decane     | 70.41              | 23.79               | 5.80               |
